# Supplementary material for: m6A demethylase FTO promotes tumor progression via regulation of lipid metabolism in esophageal cancer
Source: PubMed Central journal article supplement (PMC9107638; doi:10.1186/s13578-022-00798-3), 2022-05-14

**A**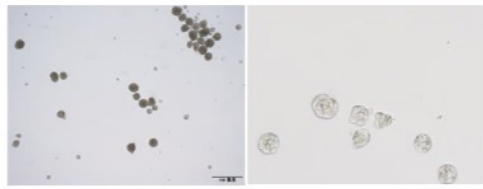

KYSE 510

TE1

**B**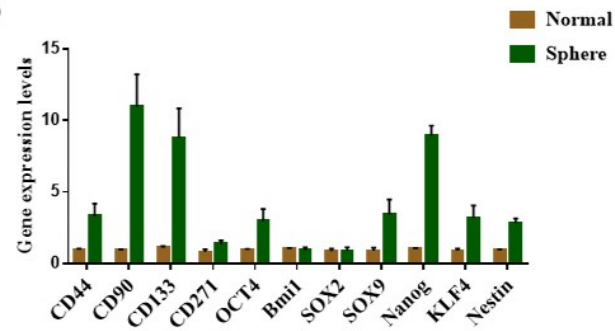

KYSE-510

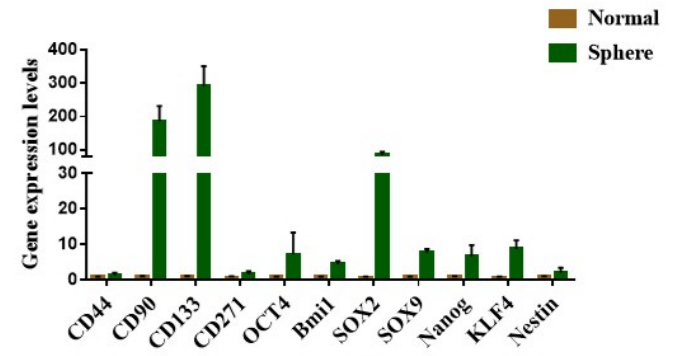

TE1

**C**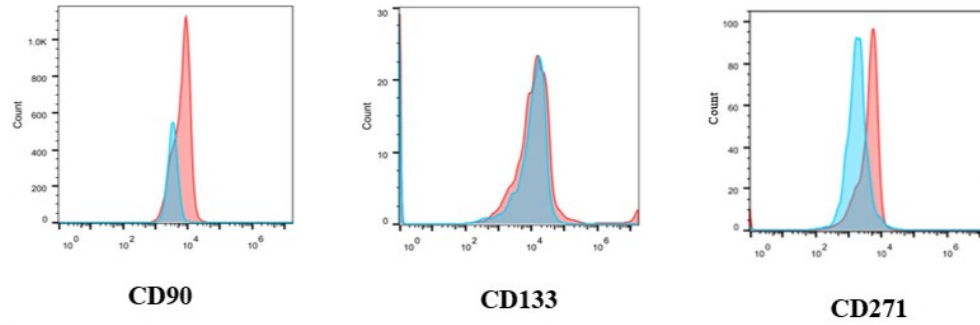

CD90

CD133

CD271

**D**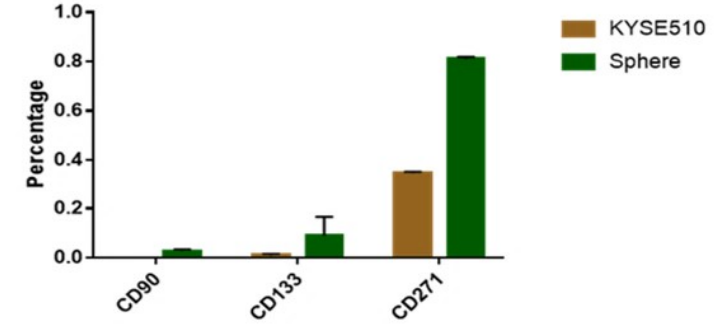**E**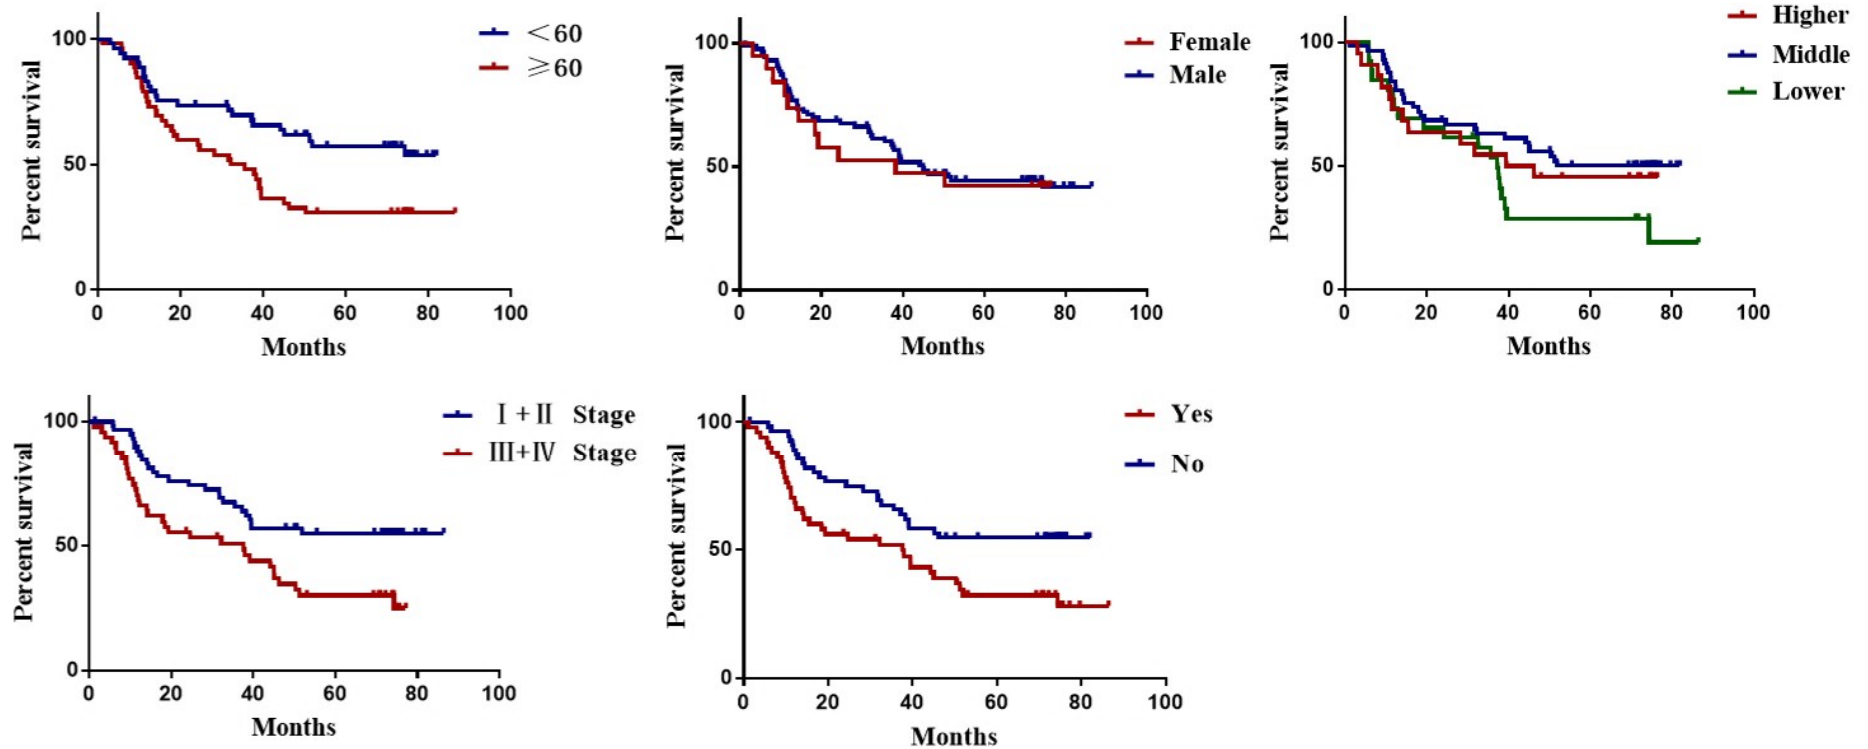

Supplement: 13578_2022_798_MOESM2_ESM.pdf [file 13578_2022_798_MOESM2_ESM.pdf]
