# Supplementary material for: m6A demethylase FTO promotes tumor progression via regulation of lipid metabolism in esophageal cancer
Source: PubMed Central journal article supplement (PMC9107638; doi:10.1186/s13578-022-00798-3), 2022-05-14

**A**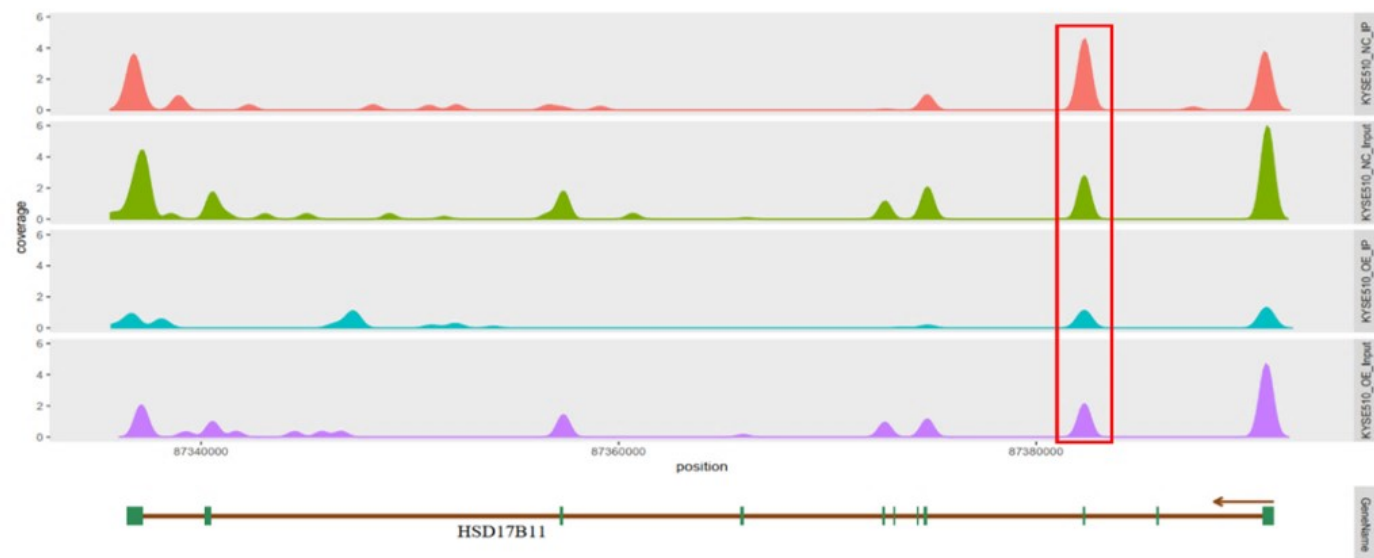**B**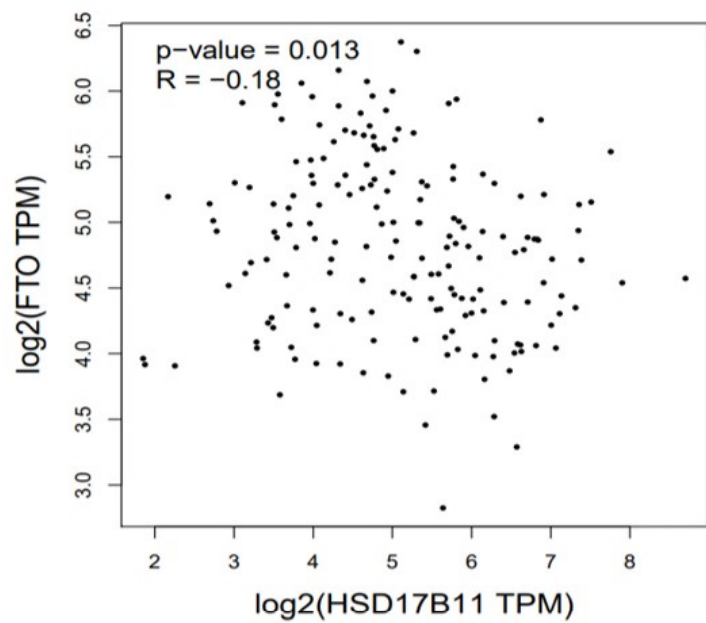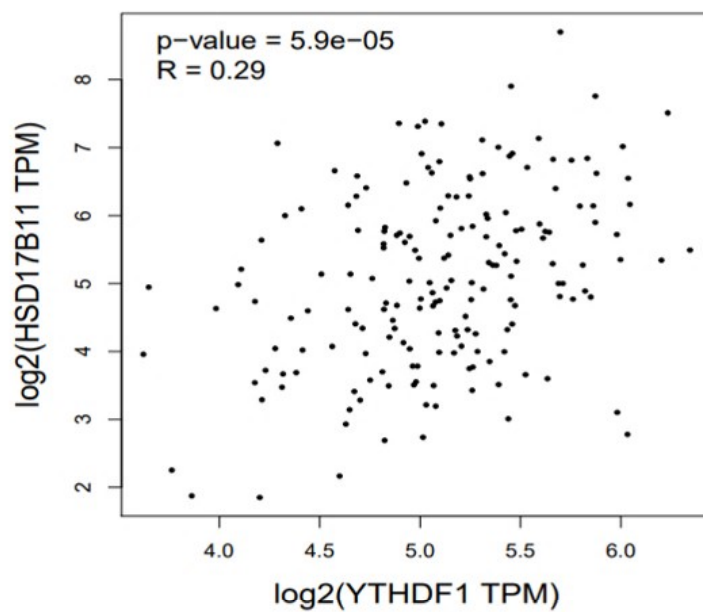**C**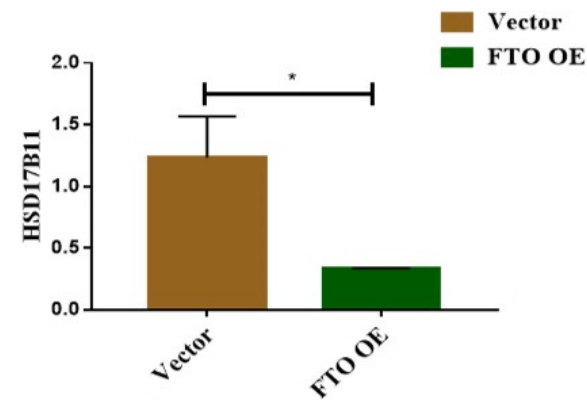**D**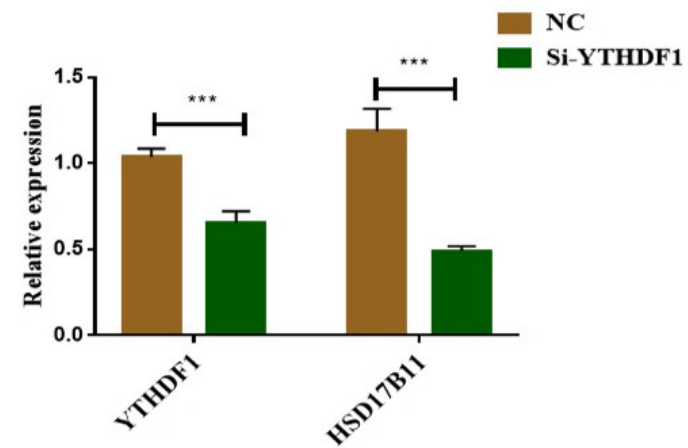

Supplement: 13578_2022_798_MOESM5_ESM.pdf [file 13578_2022_798_MOESM5_ESM.pdf]
